# Supplementary material for: Effective data visualization strategies in untargeted metabolomics
Source: Royal Society of Chemistry journal article supplement (doi:10.1039/d4np00039k), 2024-12-02
Supplement: d4np00039k1.pdf [file d4np00039k1.pdf]

# Supplement: Effective Data Visualization Strategies in Untargeted Metabolomics

Kevin Mildau,<sup>a,†,\*</sup> Henry Ehlers,<sup>b,†,\*</sup> Mara Meisenburg,<sup>c</sup> Elena Del Pup,<sup>a</sup> Robert A. Koetsier,<sup>a</sup> Laura Rosina Torres Ortega,<sup>a</sup> Niek F. de Jonge,<sup>a</sup> Kumar Saurabh Singh,<sup>a,d,e</sup> Dora Ferreira,<sup>f</sup> Kgalaleto Othibeng,<sup>g</sup> Fidele Tugizimana,<sup>g</sup> Florian Huber,<sup>h</sup> and Justin J.J. van der Hooft.<sup>a,g,\*</sup>

July 30, 2024

## 1 Datasaurus & Anscombe data examples

| Dataset            | Average of X | Average of Y | Standard Deviation of X | Standard Deviation of Y | Correlation between X and Y | Linear Model Intercept | Linear Model Slope | Linear Model R-Squared |
|--------------------|--------------|--------------|-------------------------|-------------------------|-----------------------------|------------------------|--------------------|------------------------|
| 1 Away             | 54.2661      | 47.8347      | 16.7698                 | 26.9397                 | -0.0641                     | 53.4251                | -0.103             | 0.0041                 |
| 2 Bullseye         | 54.2687      | 47.8308      | 16.7692                 | 26.9357                 | -0.0686                     | 53.8095                | -0.1102            | 0.0047                 |
| 3 Circle           | 54.2673      | 47.8377      | 16.76                   | 26.93                   | -0.0683                     | 53.797                 | -0.1098            | 0.0047                 |
| 4 Dino             | 54.2633      | 47.8323      | 16.7651                 | 26.9354                 | -0.0645                     | 53.453                 | -0.1036            | 0.0042                 |
| 5 Dots             | 54.2603      | 47.8398      | 16.7677                 | 26.9302                 | -0.0603                     | 53.0983                | -0.0969            | 0.0036                 |
| 6 High Lines       | 54.2688      | 47.8355      | 16.7667                 | 26.94                   | -0.0685                     | 53.8088                | -0.1101            | 0.0047                 |
| 7 Horizontal Lines | 54.2614      | 47.8303      | 16.7659                 | 26.9399                 | -0.0617                     | 53.2111                | -0.0992            | 0.0038                 |
| 8 Slant-Down       | 54.2678      | 47.8359      | 16.7668                 | 26.9361                 | -0.069                      | 53.8497                | -0.1108            | 0.0048                 |
| 9 Slant-Up         | 54.2659      | 47.8315      | 16.7689                 | 26.9386                 | -0.0686                     | 53.8126                | -0.1102            | 0.0047                 |
| 10 Star            | 54.2673      | 47.8395      | 16.769                  | 26.9303                 | -0.063                      | 53.3267                | -0.1011            | 0.004                  |
| 11 Vertical Lines  | 54.2699      | 47.837       | 16.77                   | 26.9377                 | -0.0694                     | 53.8908                | -0.1116            | 0.0048                 |
| 12 Wide Lines      | 54.2669      | 47.8316      | 16.77                   | 26.9379                 | -0.0666                     | 53.6349                | -0.1069            | 0.0044                 |
| 13 X-Shape         | 54.2602      | 47.8397      | 16.77                   | 26.93                   | -0.0656                     | 53.5542                | -0.1053            | 0.0043                 |

Table 1: Datasaurus data summary statistics for all twelve datasets and the **Dinosaur** data. Averages, standard deviations, correlations between X and Y variables, and linear model outcomes for a model of Y given X are close to identical for all datasets.

| dataset              | Average of X | Average of Y | Standard Deviation of X | Standard Deviation of Y | Correlation between X and Y | Linear Model Intercept | Linear Model Slope | Linear Model R-Squared |
|----------------------|--------------|--------------|-------------------------|-------------------------|-----------------------------|------------------------|--------------------|------------------------|
| 1 Anscombe Dataset 1 | 9            | 7.5009       | 3.3166                  | 2.0316                  | 0.8164                      | 3.0001                 | 0.5001             | 0.6665                 |
| 2 Anscombe Dataset 2 | 9            | 7.5009       | 3.3166                  | 2.0317                  | 0.8162                      | 3.0009                 | 0.5                | 0.6662                 |
| 3 Anscombe Dataset 3 | 9            | 7.5          | 3.3166                  | 2.0304                  | 0.8163                      | 3.0025                 | 0.4997             | 0.6663                 |
| 4 Anscombe Dataset 4 | 9            | 7.5009       | 3.3166                  | 2.0306                  | 0.8165                      | 3.0017                 | 0.4999             | 0.6667                 |

Table 2: Identical anscombe summary statistics for four datasets, each with very different scatter plots.

<sup>0a</sup> Bioinformatics Group, Wageningen University & Research, Wageningen, the Netherlands

<sup>0b</sup> Visualization Group, Institute of Visual Computing and Human-Centered Technology, TU Wien, Vienna, Austria

<sup>0c</sup> Adaptation Physiology Group, Wageningen University & Research, Wageningen, the Netherlands

<sup>0d</sup> Maastricht University Faculty of Science and Engineering, Plant Functional Genomics Maastricht, Limburg, the Netherlands

<sup>0e</sup> Faculty of Environment, Science and Economy, University of Exeter, Penryn Cornwall, United Kingdom

<sup>0f</sup> NAICONS Srl, Milan, Italy

<sup>0g</sup> Department of Biochemistry, University of Johannesburg, Johannesburg, South Africa

<sup>0h</sup> Centre for Digitalisation and Digitality, Düsseldorf University of Applied Sciences, Düsseldorf, Germany

<sup>0†</sup> These authors contributed equally to this work (shared first authorship).

<sup>0\*</sup> Corresponding authors: kevin.mildau@wur.nl, henry.ehlers@tuwien.ac.at, justin.vanderhooft@wur.nl.

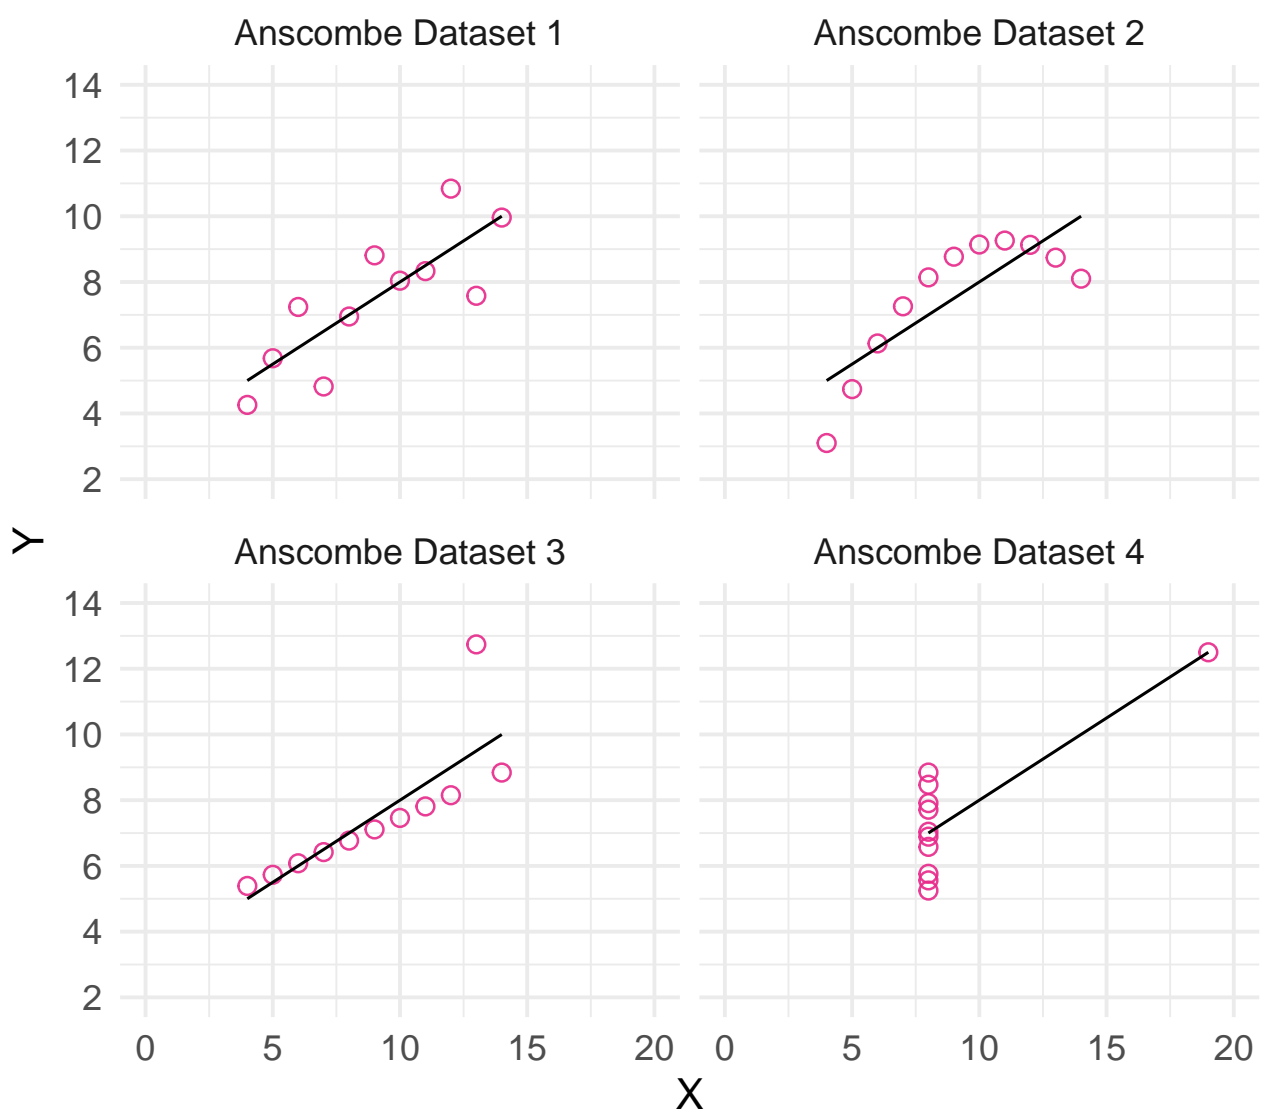

Figure 1: Anscombe data scatter plots. The four datasets show obvious differences in this representation that cannot be gleaned from summary statistics, and are very difficult to read from tabular data.

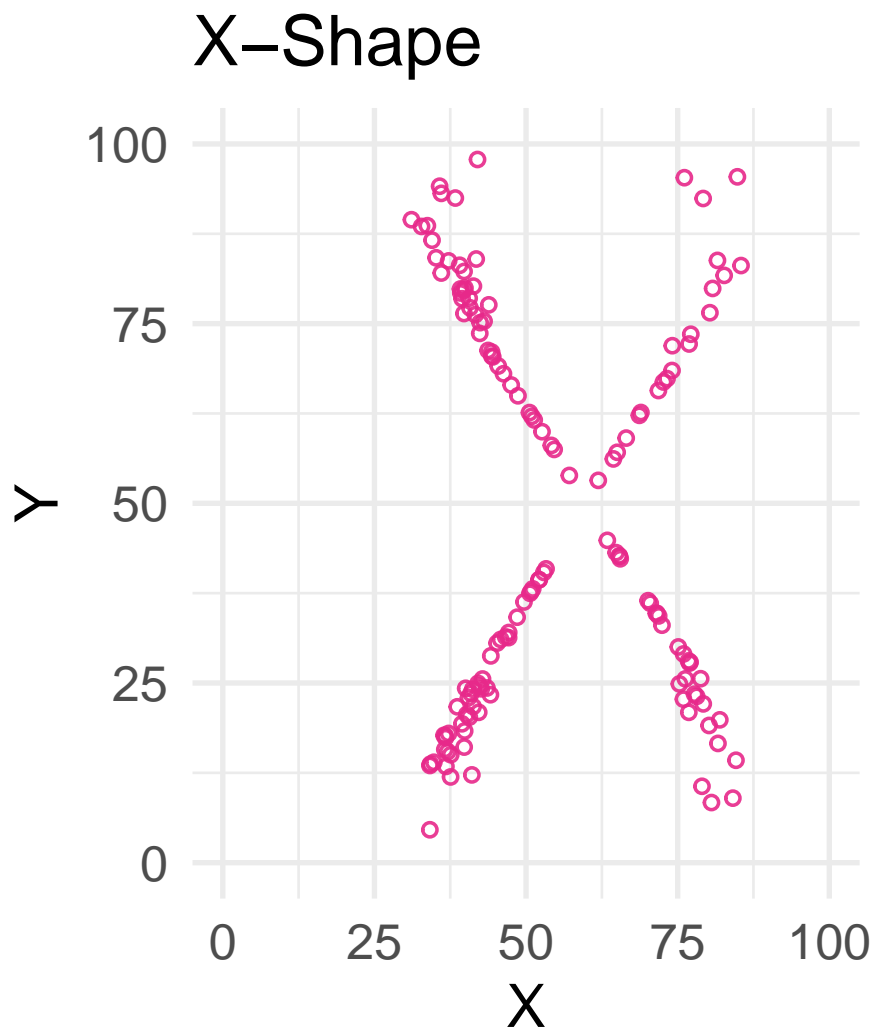

Figure 2: The X-shape dataset from the datasaurus example. As for the other datasaurus datasets, this is indistinguishable from the **Dinosaur** or any of the other datasets via common summary statistics (see table 1)

## 2 Visualization Accessibility - Who will think of the Users?

When evaluating the efficacy of a visual system, a core challenge, only truly tackled in recent years Kim et al. (2021), is the need for such visualizations to remain accessible to the visually impaired or even blind Elmqvist (2023) through, for example, sensory substitution Chundury et al. (2022). Here, instead of (solely) relying solely on visual channels to communicate data and information, non-visual channels, such as sound Zhao et al. (2008); Loeliger and Stockman (2014) or touch Taher et al. (2015); Holloway et al. (2018), can be used to make such systems more accessible and inclusive. Here, several members of the visualization community have made concerted efforts to communicate the importance of inclusivity as well as provide guidelines on how to ensure one’s visualizations and visual system remain accessible Schimpf and Beddoes (2021); Firat and Laramee (2019); Osiobe et al. (2024). While such concerns may initially sound alien and strange to both metabolomics experts and developers alike, it is worth considering that, common especially among males, colorblindness is one of these visual impairments. Here, a small and easily implemented accessibility feature, both in visualizations for publication or interactive visualization systems, is usage of colorblind-friendly colormaps and scales Nelli (2024). Beyond the inclusive use of color, we strongly encourage especially developers to read these aforementioned reviews in order to think more generally about accessibility in their visualizations.

## 3 Dataset Descriptions

Brief Descriptions of the datasets used for generating figures.

1. Natural Product Discovery Dataset: olive solid mill waste mushroom study (Khatib et al. (2024)) was used. The study obtained LC-MS/MS data and has a multi-sample statistical design component.
2. Spectral data (ESI negative ionization mode) from an untargeted metabolomics study investigating the effects of nutrient starvation on maize plants was used (Othibeng et al., 2024, unpublished). Tools such as FBMN, IIMN and Spec2Vec were explored to show the effects of different scoring methods on network clustering. So far, we only zoomed-into clustering differences of HCAs across the different tools (but other clusters belonging to different classes can also be explored).

## References

- P. Chundury, B. Patnaik, Y. Reyazuddin, C. Tang, J. Lazar, and N. Elmqvist. Towards Understanding Sensory Substitution for Accessible Visualization: An Interview Study. *IEEE Transactions on Visualization and Computer Graphics*, 28(1):1084–1094, Jan. 2022. ISSN 1941-0506. doi: 10.1109/TVCG.2021.3114829. URL <https://ieeexplore.ieee.org/document/9552177>. Conference Name: IEEE Transactions on Visualization and Computer Graphics.
- N. Elmqvist. Visualization for the Blind. *interactions*, 30(1):52–56, Jan. 2023. ISSN 1072-5520. doi: 10.1145/3571737. URL <https://doi.org/10.1145/3571737>.
- E. E. Firat and R. S. Laramee. Inclusivity for visualization education: a brief History, investigation, and guidelines. *Diálogo com a Economia Criativa*, 4(12):146–160, Dec. 2019. ISSN 2525-2828. doi: 10.22398/2525-2828.412146-160. URL <https://dialogo.homologacao.emnuvens.com.br/revistadcec-rj/article/view/258>.
- L. Holloway, K. Marriott, and M. Butler. Accessible Maps for the Blind: Comparing 3D Printed Models with Tactile Graphics. In *Proceedings of the 2018 CHI Conference on Human Factors in Computing Systems*, CHI ’18, pages 1–13, New York, NY, USA, Apr. 2018. Association for Computing Machinery. ISBN 978-1-4503-5620-6. doi: 10.1145/3173574.3173772. URL <https://doi.org/10.1145/3173574.3173772>.
- S. Khatib, I. Pereman, E. Kostanda, M. M. Zdouc, N. Ezov, R. Schweitzer, and J. J. J. van der Hoof. Olive mill solid waste induces beneficial mushroom-specialized metabolite diversity: a computational metabolomics study. *bioRxiv*, 2024. doi: 10.1101/2024.02.09.579616. URL <https://www.biorxiv.org/content/early/2024/02/09/2024.02.09.579616>.
- N. W. Kim, S. C. Joyner, A. Riegelhuth, and Y. Kim. Accessible Visualization: Design Space, Opportunities, and Challenges. *Computer Graphics Forum*, 40(3):173–188, 2021. ISSN 1467-8659. doi: 10.1111/cgf.14298. URL <https://onlinelibrary.wiley.com/doi/abs/10.1111/cgf.14298>. eprint: <https://onlinelibrary.wiley.com/doi/pdf/10.1111/cgf.14298>.
- E. Loeliger and T. Stockman. Wayfinding without Visual Cues: Evaluation of an Interactive Audio Map System. *Interacting with Computers*, 26(5):403–416, Sept. 2014. ISSN 0953-5438. doi: 10.1093/iwc/iwt042. URL <https://doi.org/10.1093/iwc/iwt042>.

- L. Nelli. Color Quest: An interactive tool for exploring color palettes and enhancing accessibility in data visualization. *PLOS ONE*, 19(3):e0290923, Mar. 2024. ISSN 1932-6203. doi: 10.1371/journal.pone.0290923. URL <https://journals.plos.org/plosone/article?id=10.1371/journal.pone.0290923>. Publisher: Public Library of Science.
- E. U. Osiobe, S. Malallah, and N. E. Osiobe. Enhancing Data Visualization Accessibility: A Case for Equity and Inclusion, May 2024. URL <https://papers.ssrn.com/abstract=4837601>.
- C. Schimpf and a. Beddoes. Designing equitable and inclusive visualizations: An underexplored facet of best practices for research and publishing. *Journal of Engineering Education*, 2021. URL <https://onlinelibrary.wiley.com/doi/10.1002/jee.20388>.
- F. Taher, J. Hardy, A. Karnik, C. Weichel, Y. Jansen, K. Hornbæk, and J. Alexander. Exploring Interactions with Physically Dynamic Bar Charts. In *Proceedings of the 33rd Annual ACM Conference on Human Factors in Computing Systems*, CHI '15, pages 3237–3246, New York, NY, USA, Apr. 2015. Association for Computing Machinery. ISBN 978-1-4503-3145-6. doi: 10.1145/2702123.2702604. URL <https://doi.org/10.1145/2702123.2702604>.
- H. Zhao, C. Plaisant, B. Shneiderman, and J. Lazar. Data Sonification for Users with Visual Impairment: A Case Study with Georeferenced Data. *ACM Trans. Comput.-Hum. Interact.*, 15(1):4:1–4:28, May 2008. ISSN 1073-0516. doi: 10.1145/1352782.1352786. URL <https://doi.org/10.1145/1352782.1352786>.
