# Supplementary figures and images for: Effective data visualization strategies in untargeted metabolomics
Source: Royal Society of Chemistry journal article supplement (doi:10.1039/d4np00039k), 2024-12-02

Anscombe Dataset 1

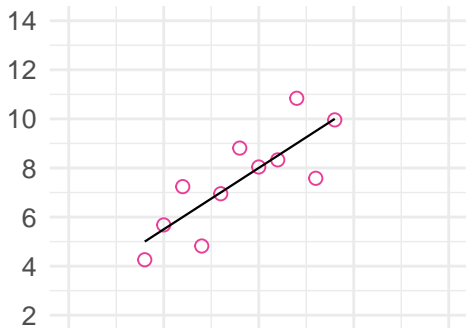

Anscombe Dataset 2

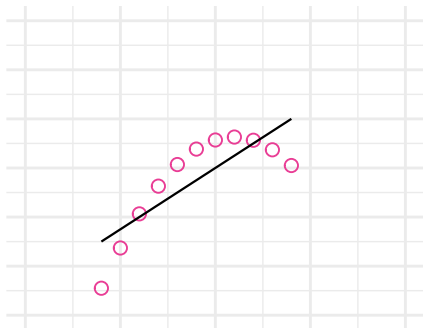

Anscombe Dataset 3

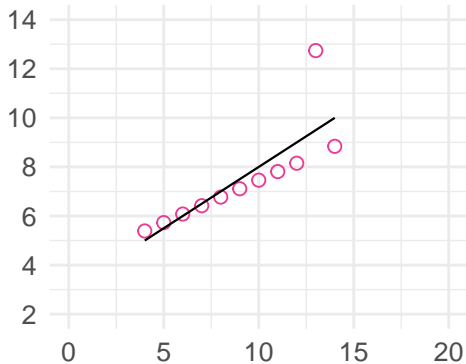

Anscombe Dataset 4

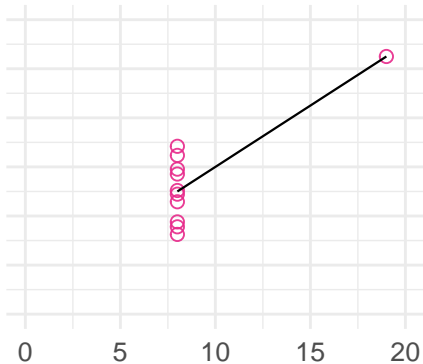

X

Supplement: d4np00039k2.zip [file d4np00039k2.zip]

# X-Shape

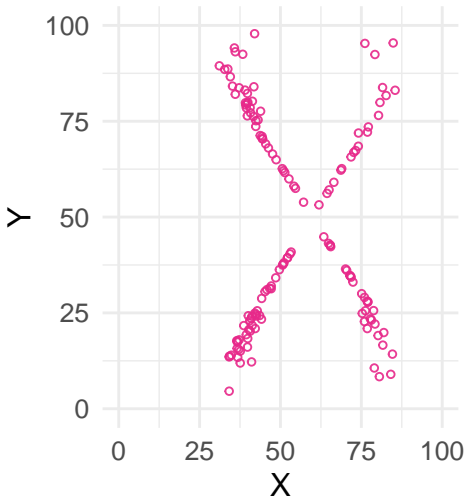

Supplement: d4np00039k2.zip [file d4np00039k2.zip]
